# Supplementary material for: Enantiomeric Effect of d-Amino Acid Substitution on the Mechanism of Action of α-Helical Membrane-Active Peptides
Source: MDPI journal article supplement (doi:10.3390/ijms19010067), 2017-12-27
Supplement: s1 [file s1]

# Enantiomeric effect of D-amino acid substitution on mechanism of action of $\alpha$ -helical membrane-active peptides

Shiyu Sun <sup>1,2</sup>, Guangxu Zhao <sup>1,2</sup>, Yibing Huang <sup>1,2,3</sup>, Mingjun Cai <sup>4,5</sup>, Qiuyan Yan <sup>4,5</sup>, Hongda Wang <sup>4,5,\*</sup> and Yuxin Chen <sup>1,2,3,\*</sup>

<sup>1</sup> Key Laboratory for Molecular Enzymology and Engineering of the Ministry of Education, Jilin University, Changchun 130012, China.

<sup>2</sup> School of Life Sciences, Jilin University, Changchun 130012, China.

<sup>3</sup> National Engineering Laboratory for AIDS Vaccine, Jilin University, Changchun 130012, China.

<sup>4</sup> State Key Laboratory of Electroanalytical Chemistry, Changchun Institute of Applied Chemistry, Chinese Academy of Sciences, Changchun, Jilin 130022, China.

<sup>5</sup> University of Chinese Academy of Sciences, Beijing 100049, China.

\* Author to whom correspondence should be addressed; E-Mail: [chen\\_yuxin@jlu.edu.cn](mailto:chen_yuxin@jlu.edu.cn) (Y. C.); [hdwang@ciac.ac.cn](mailto:hdwang@ciac.ac.cn) (H. W.); Tel.: +86-431-8515-5220 (Y. C.); +86-431-85262684 (H. W.); +86-431-8515-5200 (Y. C.); Fax: +86-431-85262864 (H. W.).

**Keywords:** membrane-active peptide, helicity, hydrophobicity, atomic force microscopy.

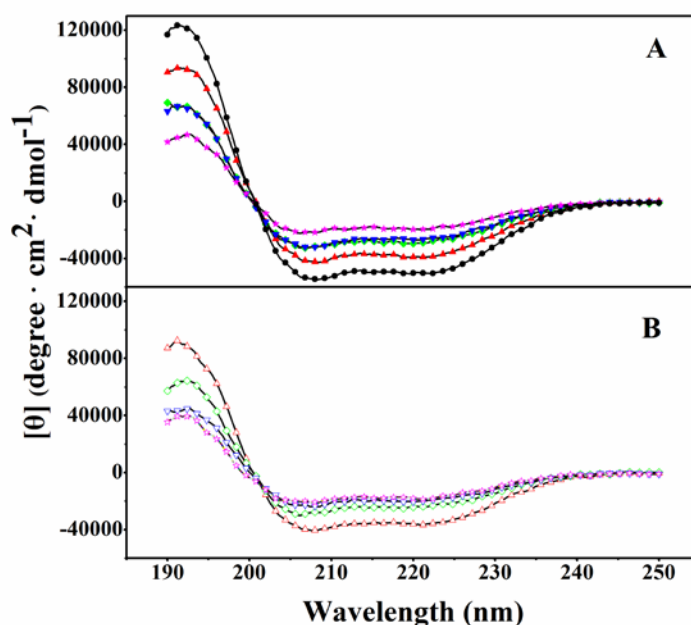

**Figure S1.** CD spectra of peptide analogs. Panels A and B denote the CD spectra of peptides in the KP buffer and 50% TFE, respectively. Symbols used are as follows: ● for V13K; ▲ for K14D; ▼ for S11D/K14D; ◆ for K14D/T15D; ★ for S11D/T14D/T15D; Δ for A12D; ▽ for F9D/A12D; ◇ for A12D/V16D; ☆ for F9D/A12D/V16D.

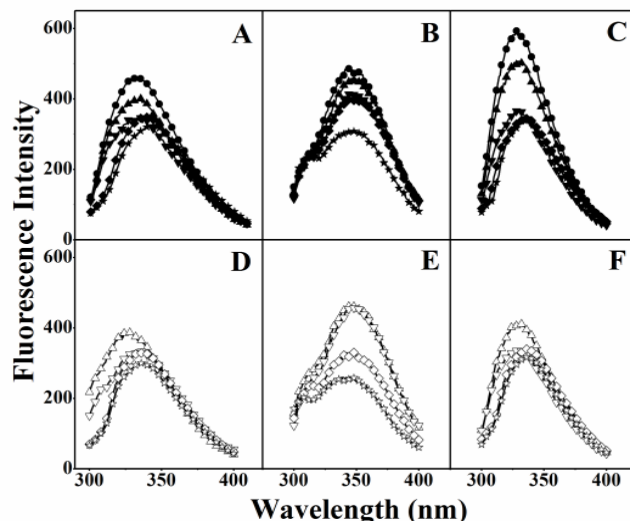

**Figure S2.** Tryptophan fluorescence emission spectra of peptides with three LUV model membranes at 25 °C. Panels A and D show spectra in LUVs mimicking eukaryotic cell membranes (PC/PG (7:3 w/w)); Panels B and E show spectra in LUVs mimicking normal cell membranes (PC/Chol (8:1 w/w)). Panels C and F show spectra in LUVs mimicking cancer cell membranes (PC/SM/PE/PS/Chol (4.35:4.35:1:0.3:1 w/w)). Symbols used are as follows: ● for V13K; ▲ for K14D; ▼ for S11D/K14D; ◆ for K14D/T15D; ★ for S11D/T14D/T15D; Δ for A12D; ▽ for F9D/A12D; ◇ for A12D/V16D; and ☆ for F9D/A12D/V16D.

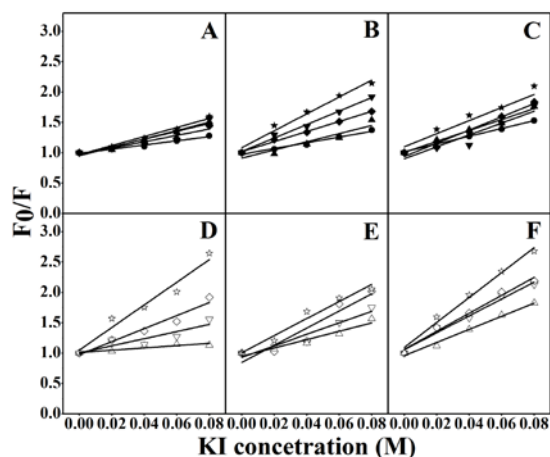

**Figure S3.** Stern–Volmer plots of peptides with three LUV models at 25 °C. Stern–Volmer plots were obtained by the sequential addition of the fluorescence quencher KI. Panels A and D show spectra in LUVs mimicking eukaryotic cell membranes (PC/PG (7:3 w/w)); Panels B and E show spectra in LUVs mimicking normal cell membranes (PC/Chol (8:1 w/w)); Panels C and F show spectra in LUVs mimicking cancer cell membranes (PC/SM/PE/PS/Chol (4.35:4.35:1:0.3:1 w/w)). Symbols used are as follows: ● for V13K; ▲ for K14D; ▼ for S11D/K14D; ◆ for K14D/T15D; ★ for S11D/T14D/T15D; Δ for A12D; ▽ for F9D/A12D; ◇ for A12D/V16D; and ☆ for F9D/A12D/V16D.
